# Supplementary material for: Simultaneous Tests of Theaflavin-3,3′-digallate as an Anti-Diabetic Drug in Human Hepatoma G2 Cells and Zebrafish (Danio rerio)
Source: MDPI journal article supplement (doi:10.3390/nu13124379), 2021-12-07
Supplement: s1 [file s1]

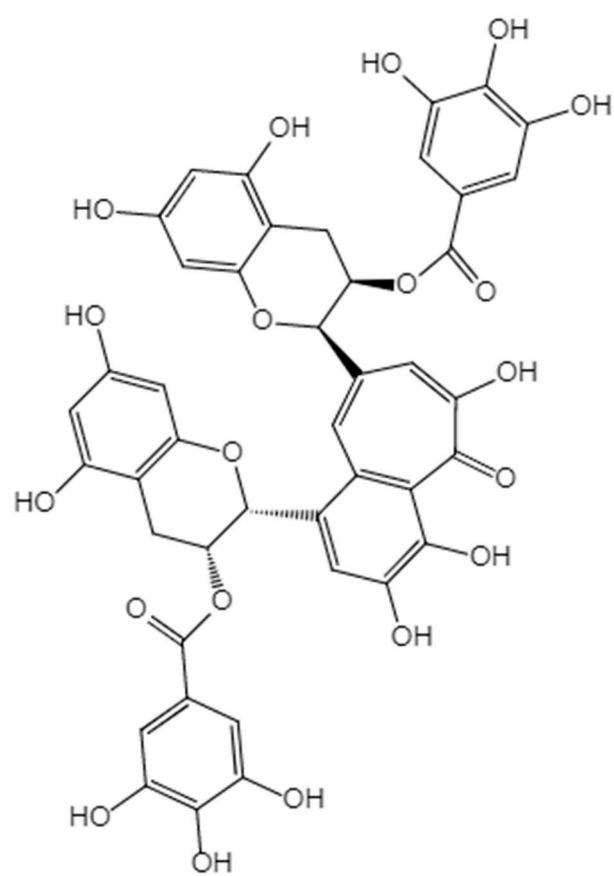

**Figure S1.** Structure of TF3.

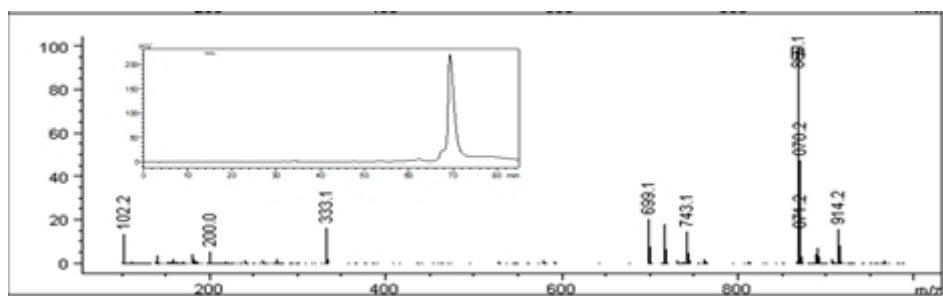

**Figure S2.** LC-MS and HPLC-UV profiles of TF3

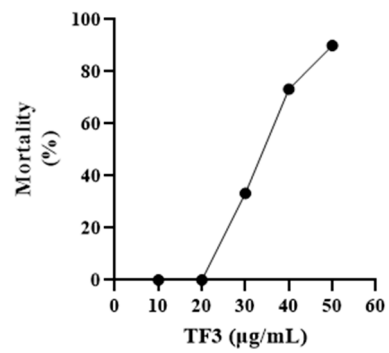

**Figure S3.** The effect of TF3 on zebrafish mortality.
